# Supplementary material
Source: MDPI journal article supplement (https://www.mdpi.com/1996-1073/13/7/1766)
Supplement: s1 [file s1]

## Sheet: Suppmat tab 1
Means and Standard deviations (n=3)			2017						2019
			Spr			ADM			Spr			ADM
			1R			1R			2R			2R			1R
Data for the baling procedures	Mean ball weight	[kg Straw FW per bale]	192.919	±	3.76553	190.527	±	6.64493	226.556	±	10.0845	230.381	±	8.11004	223.544	±	4.86604
	Bale density	[kg Straw FW m-3]	116.217	±	2.26839	114.775	±	4.00297	151.323	±	6.73572	153.878	±	5.41693	149.311	±	3.25017
	Theoretical Field Capacity (TFC)	[ha h-1]	3.76642	±	0.592444	4.03593	±	0.309034	3.94467	±	0.56646	4.04385	±	0.245433	4.12297	±	0.340418
	Effective Field Capacity (EFC)	[ha h-1]	1.58239	±	0.22394	1.72043	±	0.519352	2.37426	±	0.10056	2.32327	±	0.188348	2.29929	±	0.114777
	Field efficiency (FE)	EFC/TFC	0.425145	±	0.0718466	0.424443	±	0.119752	0.607757	±	0.0612882	0.574413	±	0.0290685	0.559368	±	0.0389496
	Material Capacity	[t straw h-1]	3.83924	±	0.542282	4.71788	±	1.26653	13.7984	±	0.366382	14.2587	±	1.16249	13.3538	±	0.19705
Data for the grain harvesting procedures	Theoretical Field Capacity (TFC)	[ha h-1]	5.04673	±	0.554479	5.29636	±	0.733107	2.31226	±	0.105229	2.22483	±	0.0250167	1.97187	±	0.0498972
	Effective Field Capacity (EFC)	[ha h-1]	3.11804	±	0.218948	3.09504	±	0.321217	1.46721	±	0.0401859	1.44182	±	0.0264115	1.3961	±	0.13029
	Field efficiency (FE)	EFC/TFC	0.619646	±	0.0276414	0.586518	±	0.0256259	0.634888	±	0.0119422	0.648048	±	0.00817225	0.707445	±	0.0533037
	Fuel consumpion	[l ha-1]	10.0103	±	0.0383071	10.1702	±	0.468085	13.6667	±	0.945163	13.3667	±	0.757188	14.2667	±	1.05987
	Material Capacity	[t grain h-1]	23.1315	±	5.09962	19.4257	±	3.07593	16.087	±	0.585781	14.8097	±	0.894069	14.4623	±	1.30297
Grain, biomass and efficiencies	Total Biomass (TB)	kg DW ha-1	13414.5	±	0	13552.2	±	0	19497.5	±	302.44	19489.4	±	701.123	19114.8	±	669.685
	Total Grain yield (GY)	kg grain DW ha-1	7369.16	±	1085.7	6305.05	±	998.425	9585.45	±	163.776	8989.08	±	698.744	9080.53	±	784.139
	Total Chaff (TC)	kg chaff DW ha-1	1834.12	±	270.223	1569.27	±	248.5	1872.62	±	31.9954	1756.12	±	136.507	1773.98	±	153.19
	Baled straw (BS)	[kg Straw DW ha-1]	2646.84	±	338.422	2560.8	±	583.28	4773.08	±	174.822	5085.56	±	150.14	4711.69	±	395.491
	Total potential harvestable straw (TPHS)	kg DW ha-1	5447.93	±	1085.7	7175.82	±	998.425	7985.27	±	121.025	8438.13	±	134.721	8202.62	±	225.269
	Straw harvest raw efficiency	BS / TPHS	0.582043	±	0.222294	0.442321	±	0.15528	0.604172	±	0.0258386	0.611677	±	0.015631	0.591515	±	0.0516544

## Sheet: Suppmat tab 2
				Mean ball weight [kg DW per Bale]				Mean ball weight [kg FW per Bale]				Bale density [kg FW m-3]
Yr	CM	RN		Mean	S.E.	n		Mean	S.E.	n		Mean	S.E.	n
2017	SPR	1R		176.057	1.6474	21		193.419	1.80986	21		116.517	1.09028	21
	ADM	1R		175.6	1.79162	23		190.957	1.9483	23		115.034	1.17368	23
2019	SPR	2R		185.923	2.6412	18		226.556	3.17925	18		151.323	2.12352	18
	ADM	2R		190.704	3.75572	19		229.921	4.72493	19		153.571	3.15592	19
		1R		180.862	2.93631	19		223.263	3.6212	19		149.124	2.41871	19
